# Supplementary material for: Peronosporales Species Associated with Strawberry Crown Rot in the Czech Republic
Source: MDPI journal article supplement (doi:10.3390/jof8040346), 2022-03-26
Supplement: s1 [file s1]

**Table S1.** The list of all isolates of Peronosporales found out in strawberry fields in the Czech Republic. The names of sampled localities and NCBI accession numbers of ITS sequences of all isolates are given.

| Plantation ID | Location of strawberry plantation | Species ID                        | Isolate ID   | NCBI GenBank accession number |
|---------------|-----------------------------------|-----------------------------------|--------------|-------------------------------|
| 1             | Blansko                           | <i>Pythium dissotocum</i> complex | (19)18_01_6b | OK257542                      |
| 2             | Praha                             | <i>Pythium dissotocum</i> complex | 18_02_1a     | OK257549                      |
| 2             | Praha                             | <i>Phytophthora cactorum</i>      | 18_02_1b     | MW193099                      |
| 2             | Praha                             | <i>Phytophthora cactorum</i>      | 18_02_3      | OK257672                      |
| 3             | Praha                             | <i>Phytophthora cactorum</i>      | 17_03_10     | MW193100                      |
| 3             | Praha                             | <i>Phytophthora cactorum</i>      | 17_03_11     | OK257589                      |
| 3             | Praha                             | <i>Phytophthora cactorum</i>      | 17_03_12     | MW646877                      |
| 3             | Praha                             | <i>Phytophthora cactorum</i>      | 17_03_13     | OK257590                      |
| 3             | Praha                             | <i>Phytophthora cactorum</i>      | 17_03_23     | OK257591                      |
| 3             | Praha                             | <i>Phytophthora cactorum</i>      | 17_03_24     | MW646878                      |
| 3             | Praha                             | <i>Phytophthora cactorum</i>      | 17_03_5      | OK257587                      |
| 4             | Praha                             | <i>Phytophthora cactorum</i>      | 17_04_10     | MW646879                      |
| 4             | Praha                             | <i>Phytophthora cactorum</i>      | 17_04_12     | MW193106                      |
| 4             | Praha                             | <i>Phytophthora cactorum</i>      | 17_04_14     | OK257599                      |
| 4             | Praha                             | <i>Phytophthora cactorum</i>      | 17_04_1a     | OK257592                      |
| 4             | Praha                             | <i>Phytophthora cactorum</i>      | 17_04_2      | OK257593                      |
| 4             | Praha                             | <i>Phytophthora cactorum</i>      | 17_04_3      | OK257594                      |
| 4             | Praha                             | <i>Phytophthora cactorum</i>      | 17_04_5      | OK257595                      |
| 4             | Praha                             | <i>Phytophthora cactorum</i>      | 17_04_7a     | OK257596                      |
| 4             | Praha                             | <i>Phytophthora cactorum</i>      | 17_04_8      | OK257597                      |
| 4             | Praha                             | <i>Phytophthora cactorum</i>      | 17_04_9      | OK257598                      |
| 5             | Havlíčkův Brod                    | –                                 | No isolate   | –                             |
| 7             | Předměřice nad Jizerou            | <i>Globisporangium irregulare</i> | (19)18_07_1  | OK257580                      |
| 7             | Předměřice nad Jizerou            | <i>Phytopythium vexans</i>        | 17_07_1      | MW193096                      |
| 7             | Předměřice nad Jizerou            | <i>Pythium perplexum</i>          | 17_07_10     | OK257585                      |
| 7             | Předměřice nad Jizerou            | <i>Phytophthora cactorum</i>      | 17_07_12a    | OK257601                      |
| 7             | Předměřice nad Jizerou            | <i>Pythium dissotocum</i> complex | 17_07_17     | OK257543                      |
| 7             | Předměřice nad Jizerou            | <i>Phytopythium mercuriale</i>    | 17_07_22     | MW646900                      |
| 7             | Předměřice nad Jizerou            | <i>Phytophthora cactorum</i>      | 17_07_23     | OK257600                      |
| 7             | Předměřice nad Jizerou            | <i>Phytophthora cactorum</i>      | 17_07_25     | MW646883                      |
| 7             | Předměřice nad Jizerou            | <i>Phytophthora cactorum</i>      | 17_07_27a    | MW646884                      |
| 7             | Předměřice nad Jizerou            | <i>Phytophthora citrophthora</i>  | 17_07_9      | MW193107                      |
| 7             | Předměřice nad Jizerou            | <i>Pythium intermedium</i>        | 18_07_11     | OK257571                      |
| 7             | Předměřice nad Jizerou            | <i>Phytophthora cactorum</i>      | 18_07_12a    | MW646885                      |
| 7             | Předměřice nad Jizerou            | <i>Pythium intermedium</i>        | 18_07_12c    | OK257572                      |
| 7             | Předměřice nad Jizerou            | <i>Pythium dissotocum</i> complex | 18_07_13     | OK257553                      |
| 7             | Předměřice nad Jizerou            | <i>Phytophthora cactorum</i>      | 18_07_14     | OK257669                      |
| 7             | Předměřice nad Jizerou            | <i>Phytopythium citrinum</i>      | 18_07_15     | OK257573                      |
| 7             | Předměřice nad Jizerou            | <i>Phytophthora cactorum</i>      | 18_07_2_S1   | MW646889                      |
| 7             | Předměřice nad Jizerou            | <i>Pythium dissotocum</i> complex | 18_07_2_S10  | OK257550                      |
| 7             | Předměřice nad Jizerou            | <i>Pythium dissotocum</i> complex | 18_07_3a     | OK257551                      |
| 7             | Předměřice nad Jizerou            | <i>Phytophthora cactorum</i>      | 18_07_6      | OK257668                      |
| 7             | Předměřice nad Jizerou            | <i>Phytopythium vexans</i>        | 18_07_9      | OK257569                      |
| 8             | Sedlčanky                         | <i>Phytophthora cactorum</i>      | 17_08_10     | OK257603                      |
| 8             | Sedlčanky                         | <i>Phytophthora cactorum</i>      | 17_08_17b    | OK257604                      |
| 8             | Sedlčanky                         | <i>Pythium dissotocum</i> complex | 17_08_3      | OK257544                      |
| 8             | Sedlčanky                         | <i>Phytophthora cactorum</i>      | 17_08_6      | OK257602                      |
| 9             | Oskořínek                         | <i>Phytophthora cactorum</i>      | 17_09_12     | OK257605                      |

| Plantation ID | Location of strawberry plantation | Species ID                        | Isolate ID | NCBI GenBank accession number |
|---------------|-----------------------------------|-----------------------------------|------------|-------------------------------|
| 9             | Oskořínek                         | <i>Phytophthora cactorum</i>      | 17_09_14a  | OK257606                      |
| 10            | Břežany II                        | <i>Pythium nodosum</i>            | 18_10_10   | OK257564                      |
| 10            | Břežany II                        | <i>Phytophthora cactorum</i>      | 18_10_11   | MW646888                      |
| 10            | Břežany II                        | <i>Phytophthora cactorum</i>      | 18_10_12   | MW646895                      |
| 10            | Břežany II                        | <i>Pythium dissotocum</i> complex | 18_10_12a  | OK257555                      |
| 10            | Břežany II                        | <i>Pythium dissotocum</i> complex | 18_10_13   | OK257556                      |
| 10            | Břežany II                        | <i>Phytophthora cactorum</i>      | 18_10_14a  | MW193116                      |
| 10            | Břežany II                        | <i>Pythium nodosum</i>            | 18_10_14b  | OK257565                      |
| 10            | Břežany II                        | <i>Phytophthora cactorum</i>      | 18_10_16   | OK257673                      |
| 10            | Břežany II                        | <i>Phytophthora cactorum</i>      | 18_10_17a  | MW646886                      |
| 10            | Břežany II                        | <i>Pythium nodosum</i>            | 18_10_17b  | OK257566                      |
| 10            | Břežany II                        | <i>Phytophthora cactorum</i>      | 18_10_18c  | MW646887                      |
| 10            | Břežany II                        | <i>Pythium dissotocum</i> complex | 18_10_5a   | OK257554                      |
| 10            | Břežany II                        | <i>Pythium dissotocum</i> complex | 18_10_7a   | OK257552                      |
| 11            | Domašín                           | <i>Phytophthora cactorum</i>      | 17_11_16   | OK257608                      |
| 11            | Domašín                           | <i>Phytophthora cactorum</i>      | 17_11_17   | OK257609                      |
| 11            | Domašín                           | <i>Phytophthora cactorum</i>      | 17_11_19   | MW646891                      |
| 11            | Domašín                           | <i>Phytophthora cactorum</i>      | 17_11_3    | OK257607                      |
| 12            | Plzeň                             | <i>Phytophthora cactorum</i>      | 17_12_10   | OK257616                      |
| 12            | Plzeň                             | <i>Phytophthora cactorum</i>      | 17_12_12   | OK257617                      |
| 12            | Plzeň                             | <i>Phytopythium vexans</i>        | 17_12_13   | OK257568                      |
| 12            | Plzeň                             | <i>Phytophthora cactorum</i>      | 17_12_16   | OK257618                      |
| 12            | Plzeň                             | <i>Phytophthora cactorum</i>      | 17_12_17a  | OK257619                      |
| 12            | Plzeň                             | <i>Phytophthora cactorum</i>      | 17_12_18a  | OK257620                      |
| 12            | Plzeň                             | <i>Phytophthora cactorum</i>      | 17_12_1b   | MW646880                      |
| 12            | Plzeň                             | <i>Phytophthora cactorum</i>      | 17_12_20   | MW193108                      |
| 12            | Plzeň                             | <i>Phytophthora cactorum</i>      | 17_12_23   | OK257621                      |
| 12            | Plzeň                             | <i>Phytophthora cactorum</i>      | 17_12_24   | OK257622                      |
| 12            | Plzeň                             | <i>Phytophthora cactorum</i>      | 17_12_25   | OK257623                      |
| 12            | Plzeň                             | <i>Phytophthora cactorum</i>      | 17_12_26   | OK257624                      |
| 12            | Plzeň                             | <i>Phytophthora cactorum</i>      | 17_12_27   | OK257625                      |
| 12            | Plzeň                             | <i>Phytophthora cactorum</i>      | 17_12_28   | OK257626                      |
| 12            | Plzeň                             | <i>Pythium dissotocum</i> complex | 17_12_29   | OK257545                      |
| 12            | Plzeň                             | <i>Phytophthora cactorum</i>      | 17_12_3    | OK257610                      |
| 12            | Plzeň                             | <i>Phytophthora cactorum</i>      | 17_12_30   | OK257627                      |
| 12            | Plzeň                             | <i>Phytophthora cactorum</i>      | 17_12_31   | OK257628                      |
| 12            | Plzeň                             | <i>Phytophthora cactorum</i>      | 17_12_4    | OK257611                      |
| 12            | Plzeň                             | <i>Phytophthora cactorum</i>      | 17_12_5a   | OK257612                      |
| 12            | Plzeň                             | <i>Phytophthora cactorum</i>      | 17_12_6a   | MW646882                      |
| 12            | Plzeň                             | <i>Phytophthora cactorum</i>      | 17_12_7    | OK257613                      |
| 12            | Plzeň                             | <i>Phytophthora cactorum</i>      | 17_12_8    | OK257614                      |
| 12            | Plzeň                             | <i>Phytophthora cactorum</i>      | 17_12_9    | OK257615                      |
| 15            | Holešov                           | <i>Phytophthora cactorum</i>      | 17_15_1    | OK257629                      |
| 15            | Holešov                           | <i>Phytophthora cactorum</i>      | 17_15_10   | MW193114                      |
| 15            | Holešov                           | <i>Phytophthora cactorum</i>      | 17_15_4a   | OK257630                      |
| 15            | Holešov                           | <i>Phytophthora cactorum</i>      | 17_15_8    | OK257631                      |
| 18            | Brno                              | <i>Phytophthora cactorum</i>      | 17_18_26   | OK257632                      |
| 23            | Novákovice                        | <i>Phytophthora cactorum</i>      | 17_23_16   | OK257639                      |
| 23            | Novákovice                        | <i>Phytophthora cactorum</i>      | 17_23_19   | MW193104                      |
| 23            | Novákovice                        | <i>Phytophthora cactorum</i>      | 17_23_1a   | OK257633                      |
| 23            | Novákovice                        | <i>Phytophthora cactorum</i>      | 17_23_3a   | OK257634                      |

| Plantation ID | Location of strawberry plantation | Species ID                        | Isolate ID | NCBI GenBank accession number |
|---------------|-----------------------------------|-----------------------------------|------------|-------------------------------|
| 23            | Novákovice                        | <i>Phytophthora cactorum</i>      | 17_23_4a   | OK257635                      |
| 23            | Novákovice                        | <i>Phytophthora cactorum</i>      | 17_23_7    | OK257636                      |
| 23            | Novákovice                        | <i>Phytophthora cactorum</i>      | 17_23_8    | OK257637                      |
| 23            | Novákovice                        | <i>Phytophthora cactorum</i>      | 17_23_9    | OK257638                      |
| 24            | Lotouš                            | <i>Phytophthora cactorum</i>      | 17_24_12   | OK257644                      |
| 24            | Lotouš                            | <i>Phytophthora cactorum</i>      | 17_24_19   | OK257645                      |
| 24            | Lotouš                            | <i>Phytophthora cactorum</i>      | 17_24_20   | OK257646                      |
| 24            | Lotouš                            | <i>Phytophthora cactorum</i>      | 17_24_26   | OK257647                      |
| 24            | Lotouš                            | <i>Phytophthora cactorum</i>      | 17_24_3    | OK257640                      |
| 24            | Lotouš                            | <i>Phytophthora cactorum</i>      | 17_24_4    | OK257641                      |
| 24            | Lotouš                            | <i>Phytophthora cactorum</i>      | 17_24_59   | OK257642                      |
| 24            | Lotouš                            | <i>Phytophthora cactorum</i>      | 17_24_5b   | OK257643                      |
| 24            | Lotouš                            | <i>Phytophthora cactorum</i>      | 17_24_5c   | OK257644                      |
| 24            | Lotouš                            | <i>Pythium dissotocum</i> complex | 17_24_6    | OK257645                      |
| 24            | Lotouš                            | <i>Pythium dissotocum</i> complex | 17_24_7    | OK257646                      |
| 24            | Lotouš                            | <i>Pythium dissotocum</i> complex | 17_24_8a   | OK257647                      |
| 26            | Sedlčanky                         | <i>Phytophthora cactorum</i>      | 17_26_12   | OK257648                      |
| 26            | Sedlčanky                         | <i>Phytophthora cactorum</i>      | 17_26_14   | OK257649                      |
| 26            | Sedlčanky                         | <i>Phytophthora cactorum</i>      | 17_26_3    | OK257650                      |
| 26            | Sedlčanky                         | <i>Pythium dissotocum</i> complex | 17_26_6    | OK257651                      |
| 26            | Sedlčanky                         | <i>Pythium dissotocum</i> complex | 17_26_8    | OK257652                      |
| 26            | Sedlčanky                         | <i>Pythium dissotocum</i> complex | 17_26_9    | OK257653                      |
| 27            | Turnov                            | <i>Pythium dissotocum</i> complex | 17_27_2    | OK257654                      |
| 28            | Přelovice                         | <i>Phytophthora cactorum</i>      | 19_28_10   | OK257655                      |
| 28            | Přelovice                         | <i>Pythium mamillatum</i>         | 19_28_12b  | OK257656                      |
| 28            | Přelovice                         | <i>Phytophthora cactorum</i>      | 19_28_2    | OK257657                      |
| 28            | Přelovice                         | <i>Globisporangium ultimum</i>    | 19_28_3a   | OK257658                      |
| 28            | Přelovice                         | <i>Globisporangium irregulare</i> | 19_28_3c   | OK257659                      |
| 28            | Přelovice                         | <i>Globisporangium irregulare</i> | 19_28_4    | OK257660                      |
| 28            | Přelovice                         | <i>Pythium dissotocum</i> complex | 19_28_5    | OK257661                      |
| 28            | Přelovice                         | <i>Pythium mamillatum</i>         | 19_28_6b   | OK257662                      |
| 28            | Přelovice                         | <i>Phytophthora lacustris</i>     | 19_28_7    | OK257663                      |
| 28            | Přelovice                         | <i>Pythium dissotocum</i> complex | 19_28_8a   | OK257664                      |
| 28            | Přelovice                         | <i>Pythium dissotocum</i> complex | 19_28_9b   | OK257665                      |
| 30            | Svádov                            | <i>Phytophthora cactorum</i>      | 17_30_12a  | OK257666                      |
| 30            | Svádov                            | <i>Phytophthora cactorum</i>      | 17_30_13   | OK257667                      |
| 30            | Svádov                            | <i>Phytophthora cactorum</i>      | 17_30_18   | OK257668                      |
| 30            | Svádov                            | <i>Phytophthora cactorum</i>      | 17_30_3    | OK257669                      |
| 30            | Svádov                            | <i>Phytophthora cactorum</i>      | 17_30_6    | OK257670                      |
| 30            | Svádov                            | <i>Phytophthora cactorum</i>      | 17_30_8    | OK257671                      |
| 30            | Svádov                            | <i>Phytophthora cactorum</i>      | 17_30_9    | OK257672                      |
| 31            | Němčičky                          | <i>Pythium nodosum</i>            | 17_31_6    | OK257673                      |
| 33            | Šakvice                           | <i>Globisporangium ultimum</i>    | 18_33_12   | OK257674                      |
| 33            | Šakvice                           | <i>Phytophthora cactorum</i>      | 18_33_3    | OK257675                      |
| 33            | Šakvice                           | <i>Pythium heterothallicum</i>    | 18_33_3b   | OK257676                      |
| 34            | Poděbrady                         | <i>Pythium torulosum</i>          | 17_34_4    | OK257677                      |
| 34            | Poděbrady                         | <i>Phytophthora cactorum</i>      | 17_34_7    | OK257678                      |
| 37            | Brožany                           | <i>Phytophthora cactorum</i>      | 17_37_10   | OK257679                      |
| 37            | Brožany                           | <i>Phytophthora cactorum</i>      | 17_37_11   | OK257680                      |
| 37            | Brožany                           | <i>Phytophthora cactorum</i>      | 17_37_15   | OK257681                      |
| 37            | Brožany                           | <i>Phytophthora cactorum</i>      | 17_37_7a   | OK257682                      |

| Plantation ID | Location of strawberry plantation | Species ID                        | Isolate ID   | NCBI GenBank accession number |
|---------------|-----------------------------------|-----------------------------------|--------------|-------------------------------|
| 38            | Chlumec                           | –                                 | No isolate   | -                             |
| 39            | Vrkoč                             | <i>Globisporangium ultimum</i>    | (19)18_39_6a | MW193111                      |
| 39            | Vrkoč                             | <i>Pythium aphanidermatum</i>     | (19)18_39_6b | MW193112                      |
| 41            | Louny                             | -                                 | No isolate   | -                             |
| 42            | Starý Kolín                       | <i>Pythium torulosum</i>          | 18_42_16     | OK257562                      |
| 42            | Starý Kolín                       | <i>Phytophthora cactorum</i>      | 19_42_10a    | MW193113                      |
| 42            | Starý Kolín                       | <i>Pythium dissotocum</i> complex | 19_42_15     | OK257560                      |
| 42            | Starý Kolín                       | <i>Phytophthora cactorum</i>      | 19_42_17a    | OK257671                      |
| 42            | Starý Kolín                       | <i>Pythium rostratifingens</i>    | 19_42_7b     | OK257584                      |
| 43            | Kouřim                            | <i>Pythium heterothallicum</i>    | (19)18_43_1  | MW646902                      |
| 43            | Kouřim                            | <i>Pythium salpingophorum</i>     | (19)18_43_9  | OK257588                      |
| 44            | Stebno                            | <i>Phytophthora cactorum</i>      | 17_44_12     | OK257662                      |
| 45            | Veselá                            | <i>Phytophthora cactorum</i>      | 17_45_1a     | OK257663                      |
| 45            | Veselá                            | <i>Phytophthora cactorum</i>      | 17_45_1b     | OK257664                      |
| 48            | Lovčický                          | <i>Phytopythium montanum</i>      | 18_48_1      | OK257578                      |
| 50            | Pojedy                            | <i>Pythium nodosum</i>            | 17_50_1      | OK257567                      |
| 51            | Smrkov                            | –                                 | No isolate   | -                             |
| 53            | Mokrá                             | <i>Phytophthora cactorum</i>      | 17_53_3      | OK257665                      |
| 55            | Malochyně                         | –                                 | No isolate   | -                             |
| 56            | Svijanský Újezd                   | –                                 | No isolate   | -                             |
| 57            | Vraňany nad Vltavou               | <i>Phytophthora citrophthora</i>  | 17_57_1P     | MW646897                      |
| 57            | Vraňany nad Vltavou               | <i>Phytophthora cactorum</i>      | 17_57_F1     | OK257666                      |
| 57            | Vraňany nad Vltavou               | <i>Phytopythium vexans</i>        | 18_57_64     | OK257570                      |
| 58            | Sobíňov                           | –                                 | No isolate   | -                             |
| 60            | Lhota pod Libčany                 | <i>Phytophthora cactorum</i>      | 17_60_25     | OK257667                      |
| 60            | Lhota pod Libčany                 | <i>Phytophthora cactorum</i>      | 17_60_26     | MW193095                      |
| 62            | Hradec Králové                    | <i>Pythium heterothallicum</i>    | (19)18_62_5b | OK257576                      |
| 62            | Hradec Králové                    | <i>Pythium intermedium</i>        | (19)18_62_9a | OK257574                      |
| 62            | Hradec Králové                    | <i>Phytophthora cactorum</i>      | 18_62_9      | OK257670                      |
| 99            | Josefínská Huť                    | <i>Phytophthora pluvivora</i>     | 17_99_1      | MW646899                      |
| 99            | Josefínská Huť                    | <i>Phytophthora cryptogea</i>     | 17_99_2      | OK257675                      |
